# Supplementary material for: The Fast-Evolving phy-2 Gene Modulates Sexual Development in Response to Light in the Model Fungus Neurospora crassa
Source: PubMed Central journal article supplement — mBio. 2016 Mar 8;7(2):e02148-15. doi: 10.1128/mBio.02148-15 (PMC4810495; doi:10.1128/mbio.02148-15), 2016-03-08
Supplement: mbo001162714st2.pdf [file mbo001162714st2.pdf]

Supplemental Table S2A: Functional enrichment analysis for genes significantly differentially expressed between genotypes under varied light conditions, based on results in Table S1.

| Light condition*                       | Comparison**                      | Numbers of genes              | FunCat***                                             | hits                                                            | P value     |             |
|----------------------------------------|-----------------------------------|-------------------------------|-------------------------------------------------------|-----------------------------------------------------------------|-------------|-------------|
| Dark                                   | <i>wt</i> > $\Delta$ <i>phy-1</i> | 570                           | FunCat ID                                             | category                                                        |             |             |
|                                        |                                   |                               | 20                                                    | cellular transport, transport facilitation and transport routes | 34          | 0.009742033 |
|                                        |                                   |                               | 11                                                    | transcription                                                   | 51          | 0.012154446 |
|                                        |                                   |                               | 14                                                    | protein fate (folding, modification, destination)               | 31          | 0.023879067 |
|                                        |                                   |                               | 34                                                    | interaction with the environment                                | 14          | 0.025798119 |
|                                        | 10                                | cell cycle and dna processing | 43                                                    | 0.029836814                                                     |             |             |
|                                        | <i>wt</i> < $\Delta$ <i>phy-1</i> | 34                            | 1.05                                                  | C-compound and carbohydrate metabolism                          | 7           | 0.002044641 |
|                                        |                                   |                               | 1.25                                                  | extracellular metabolism                                        | 2           | 0.005460742 |
|                                        |                                   |                               | 42.27                                                 | extracellular / secretion proteins                              | 1           | 0.039196902 |
|                                        | <i>wt</i> > $\Delta$ <i>phy-2</i> | 30                            | 01.05.03                                              | polysaccharide metabolism                                       | 3           | 0.004452304 |
|                                        |                                   |                               | 16.19.05                                              | GTP binding                                                     | 2           | 0.012907326 |
|                                        |                                   |                               | 01.03.07                                              | deoxyribonucleotide metabolism                                  | 1           | 0.025362670 |
|                                        |                                   |                               | 01.05.02                                              | sugar, glucoside, polyol and carboxylate metabolism             | 2           | 0.041317302 |
|                                        | <i>wt</i> < $\Delta$ <i>phy-2</i> | 374                           | 1                                                     | metabolism                                                      | 57          | 0.003016224 |
| 14                                     |                                   |                               | protein fate (folding, modification, destination)     | 10                                                              | 0.005855991 |             |
| 16                                     |                                   |                               | protein with binding function or cofactor requirement | 21                                                              | 0.007508537 |             |
| 12                                     |                                   |                               | protein synthesis                                     | 2                                                               | 0.010987566 |             |
| 11                                     |                                   |                               | transcription                                         | 10                                                              | 0.045926619 |             |
| <i>wt</i> > $\Delta$ <i>phy-1phy-2</i> | 91                                | 10.01                         | DNA processing                                        | 5                                                               | 0.036402992 |             |
|                                        |                                   | 1.03                          | nucleotide/nucleoside/nucleobase metabolism           | 4                                                               | 0.037770441 |             |
| <i>wt</i> < $\Delta$ <i>phy-1phy-2</i> | 251                               | 14                            | protein fate (folding, modification, destination)     | 2                                                               | 9.16E-06    |             |
|                                        |                                   | 1                             | metabolism                                            | 47                                                              | 0.000355600 |             |
|                                        |                                   | 11                            | transcription                                         | 5                                                               | 0.009030819 |             |
|                                        |                                   | 10                            | cell cycle and dna processing                         | 4                                                               | 0.013944346 |             |
|                                        |                                   | 12                            | protein synthesis                                     | 1                                                               | 0.020063531 |             |
|                                        |                                   | 2                             | energy                                                | 12                                                              | 0.041220991 |             |
| Short-light<br>(5–30 minutes)          | <i>wt</i> > $\Delta$ <i>phy-1</i> | 868                           | 11                                                    | transcription                                                   | 102         | 8.32E-09    |
|                                        |                                   |                               | 2                                                     | energy                                                          | 13          | 0.000119794 |

|  |                            |      |                                                                    |     |             |
|--|----------------------------|------|--------------------------------------------------------------------|-----|-------------|
|  |                            |      | 10 cell cycle and dna processing                                   | 76  | 0.000273360 |
|  |                            |      | 12 protein synthesis                                               | 47  | 0.001366762 |
|  |                            |      | 32 cell rescue, defense and virulence                              | 34  | 0.012764613 |
|  | <i>wt &lt; Δphy-1</i>      | 729  | 14 protein fate (folding, modification, destination)               | 11  | 7.55e-10    |
|  |                            |      | 10 cell cycle and dna processing                                   | 6   | 1.53e-08    |
|  |                            |      | 16 protein with binding function or cofactor requirement           | 37  | 1.89e-06    |
|  |                            |      | 11 transcription                                                   | 13  | 4.19e-06    |
|  |                            |      | 20 cellular transport, transport facilitation and transport routes | 69  | 0.000465769 |
|  |                            |      | 30 cellular communication/signal transduction mechanism            | 3   | 0.000530156 |
|  |                            |      | 40 cell fate                                                       | 2   | 0.000956294 |
|  |                            |      | 12 protein synthesis                                               | 6   | 0.001294734 |
|  |                            |      | 1 metabolism                                                       | 104 | 0.007145111 |
|  |                            |      | 18 regulation of metabolism and protein function                   | 3   | 0.008979217 |
|  |                            |      | 43 cell type differentiation                                       | 5   | 0.009189262 |
|  |                            |      | 42 biogenesis of cellular components                               | 15  | 0.022263649 |
|  | <i>wt &gt; Δphy-2</i>      | 47   | 12 protein synthesis                                               | 6   | 0.000987466 |
|  |                            |      | 1 metabolism                                                       | 2   | 0.033551134 |
|  |                            |      | 16 protein with binding function or cofactor requirement           | 9   | 0.048508082 |
|  | <i>wt &lt; Δphy-2</i>      | 2435 | 16 protein with binding function or cofactor requirement           | 175 | 8.09e-11    |
|  |                            |      | 10 cell cycle and dna processing                                   | 63  | 2.79e-09    |
|  |                            |      | 11 transcription                                                   | 82  | 4.41e-08    |
|  |                            |      | 12 protein synthesis                                               | 35  | 4.34e-06    |
|  |                            |      | 14 protein fate (folding, modification, destination)               | 113 | 1.00e-05    |
|  |                            |      | 40 cell fate                                                       | 21  | 3.18e-05    |
|  |                            |      | 42 biogenesis of cellular components                               | 62  | 3.59e-05    |
|  |                            |      | 43 cell type differentiation                                       | 27  | 5.53e-05    |
|  |                            |      | 1 metabolism                                                       | 366 | 6.90e-05    |
|  |                            |      | 18 regulation of metabolism and protein function                   | 19  | 0.000124549 |
|  |                            |      | 30 cellular communication/signal transduction mechanism            | 29  | 0.000129588 |
|  | <i>wt &gt; Δphy-1phy-2</i> | 165  | 16 protein with binding function or cofactor requirement           | 27  | 0.007256799 |
|  |                            |      | 11 transcription                                                   | 17  | 0.008902073 |
|  |                            |      | 12 protein synthesis                                               | 9   | 0.042823408 |
|  | <i>wt &lt; Δphy-1phy-2</i> | 1010 | 14 protein fate (folding, modification, destination)               | 15  | 7.64e-12    |

|                                                         |                                   |                     |                                                                    |             |             |
|---------------------------------------------------------|-----------------------------------|---------------------|--------------------------------------------------------------------|-------------|-------------|
|                                                         |                                   |                     | 11 transcription                                                   | 14          | 5.44e-09    |
|                                                         |                                   |                     | 16 protein with binding function or cofactor requirement           | 45          | 8.20e-09    |
|                                                         |                                   |                     | 1 metabolism                                                       | 146         | 2.03e-06    |
|                                                         |                                   |                     | 10 cell cycle and dna processing                                   | 16          | 9.17e-06    |
|                                                         |                                   |                     | 12 protein synthesis                                               | 6           | 3.17e-05    |
|                                                         |                                   |                     | 42 biogenesis of cellular components                               | 14          | 0.000142166 |
|                                                         |                                   |                     | 40 cell fate                                                       | 3           | 0.000176486 |
|                                                         |                                   |                     | 43 cell type differentiation                                       | 6           | 0.001890744 |
|                                                         |                                   |                     | 18 regulation of metabolism and protein function                   | 5           | 0.012975309 |
|                                                         |                                   |                     | 30 cellular communication/signal transduction mechanism            | 9           | 0.022183862 |
| Medium-light<br>(45-90 minutes)                         | <i>wt</i> > $\Delta$ <i>phy-1</i> | 1672                | 11 transcription                                                   | 143         | 7.96e-07    |
|                                                         |                                   |                     | 12 protein synthesis                                               | 73          | 0.000413473 |
|                                                         |                                   |                     | 20 cellular transport, transport facilitation and transport routes | 102         | 0.000796570 |
|                                                         |                                   |                     | 2 energy                                                           | 32          | 0.001610322 |
|                                                         |                                   |                     | 1 metabolism                                                       | 207         | 0.003619794 |
|                                                         |                                   |                     | 14 protein fate (folding, modification, destination)               | 97          | 0.017054629 |
|                                                         |                                   |                     | 10 cell cycle and dna processing                                   | 103         | 0.031781590 |
|                                                         | <i>wt</i> < $\Delta$ <i>phy-1</i> | 258                 | 16 protein with binding function or cofactor requirement           | 10          | 7.54e-05    |
|                                                         |                                   |                     | 10 cell cycle and dna processing                                   | 2           | 0.000593475 |
|                                                         |                                   |                     | 14 protein fate (folding, modification, destination)               | 6           | 0.002773060 |
|                                                         |                                   |                     | 12 protein synthesis                                               | 1           | 0.013021562 |
|                                                         |                                   |                     | 20 cellular transport, transport facilitation and transport routes | 27          | 0.020119186 |
|                                                         | <i>wt</i> > $\Delta$ <i>phy-2</i> | 142                 | 11 transcription                                                   | 6           | 0.022447518 |
|                                                         |                                   |                     | 01.05.02 sugar, glucoside, polyol and carboxylate metabolism       | 4           | 0.026105816 |
|                                                         | <i>wt</i> < $\Delta$ <i>phy-2</i> | 973                 | 32.01.04 pH stress response                                        | 1           | 0.029112861 |
|                                                         |                                   |                     | 10 cell cycle and dna processing                                   | 19          | 3.08E-06    |
|                                                         |                                   |                     | 16 protein with binding function or cofactor requirement           | 66          | 1.90E-05    |
|                                                         |                                   |                     | 14 protein fate (folding, modification, destination)               | 36          | 6.11E-05    |
|                                                         |                                   |                     | 11 transcription                                                   | 29          | 0.000137743 |
|                                                         |                                   |                     | 18 regulation of metabolism and protein function                   | 6           | 0.006501374 |
| 30 cellular communication/signal transduction mechanism |                                   |                     | 11                                                                 | 0.023450994 |             |
| 40 cell fate                                            |                                   |                     | 9                                                                  | 0.028843913 |             |
| <i>wt</i> > $\Delta$ <i>phy-1phy-2</i>                  | 112                               | 34.05 cell motility | 2                                                                  | 0.010287373 |             |

|                                    |                            |                                                                                                |                                                                    |             |             |
|------------------------------------|----------------------------|------------------------------------------------------------------------------------------------|--------------------------------------------------------------------|-------------|-------------|
|                                    |                            |                                                                                                | 42.05 centrosome                                                   | 1           | 0.024434886 |
|                                    | <i>wt &lt; Δphy-1phy-2</i> | 3651                                                                                           | 12 protein synthesis                                               | 80          | 9.63E-06    |
|                                    |                            |                                                                                                | 11 transcription                                                   | 185         | 1.25E-05    |
|                                    |                            |                                                                                                | 16 protein with binding function or cofactor requirement           | 383         | 1.32E-05    |
|                                    |                            |                                                                                                | 30 cellular communication/signal transduction mechanism            | 109         | 0.035985731 |
| Long-light<br>(120-240<br>minutes) | <i>wt &gt; Δphy-1</i>      | 769                                                                                            | 11 transcription                                                   | 94          | 3.80e-11    |
|                                    |                            |                                                                                                | 2 energy                                                           | 12          | 0.002452591 |
|                                    |                            |                                                                                                | 12 protein synthesis                                               | 38          | 0.006037258 |
|                                    |                            |                                                                                                | 32 cell rescue, defense and virulence                              | 25          | 0.006225415 |
|                                    |                            |                                                                                                | 16 protein with binding function or cofactor requirement           | 112         | 0.018803074 |
|                                    |                            |                                                                                                | 14 protein fate (folding, modification, destination)               | 45          | 0.040435595 |
|                                    | <i>wt &lt; Δphy-1</i>      | 222                                                                                            | 14 protein fate (folding, modification, destination)               | 2           | 3.88e-06    |
|                                    |                            |                                                                                                | 1 metabolism                                                       | 52          | 1.75e-05    |
|                                    |                            |                                                                                                | 10 cell cycle and dna processing                                   | 1           | 8.06e-05    |
|                                    |                            |                                                                                                | 20 cellular transport, transport facilitation and transport routes | 29          | 0.006909646 |
|                                    |                            |                                                                                                | 12 protein synthesis                                               | 2           | 0.044138580 |
|                                    | <i>wt &gt; Δphy-2</i>      | 109                                                                                            | 20.03 transport facilities                                         | 6           | 0.017921697 |
|                                    |                            |                                                                                                | 20.01 transported compounds (substrates)                           | 10          | 0.018788153 |
|                                    |                            |                                                                                                | 42.01 cell wall                                                    | 4           | 0.023392619 |
|                                    | <i>wt &lt; Δphy-2</i>      | 768                                                                                            | 16 protein with binding function or cofactor requirement           | 50          | 1.28e-05    |
|                                    |                            |                                                                                                | 1 metabolism                                                       | 133         | 4.54e-05    |
|                                    |                            |                                                                                                | 11 transcription                                                   | 21          | 8.23e-05    |
|                                    |                            |                                                                                                | 12 protein synthesis                                               | 6           | 8.86e-05    |
| 10 cell cycle and dna processing   |                            |                                                                                                | 21                                                                 | 0.003021290 |             |
| <i>wt &gt; Δphy-1phy-2</i>         | 35                         | 10.01.05 DNA recombination and DNA repair<br>degradation / modification of foreign (exogenous) | 3                                                                  | 0.009963034 |             |
|                                    |                            | 32.10.07 polysaccharides                                                                       | 1                                                                  | 0.033454990 |             |
|                                    |                            | 01.20.01 metabolism of primary metabolic sugar derivatives                                     | 1                                                                  | 0.043542186 |             |
|                                    |                            | 01.25.01 extracellular polysaccharide degradation                                              | 1                                                                  | 0.048549810 |             |
| <i>wt &lt; Δphy-1phy-2</i>         | 2126                       | 11 transcription                                                                               | 56                                                                 | 1.38e-09    |             |
|                                    |                            | 14 protein fate (folding, modification, destination)                                           | 77                                                                 | 4.08e-08    |             |
|                                    |                            | 16 protein with binding function or cofactor requirement                                       | 143                                                                | 5.97e-08    |             |
|                                    |                            | 1 metabolism                                                                                   | 314                                                                | 1.21e-07    |             |

|  |  |  |    |                                                      |    |             |
|--|--|--|----|------------------------------------------------------|----|-------------|
|  |  |  | 12 | protein synthesis                                    | 22 | 2.08e-07    |
|  |  |  | 40 | cell fate                                            | 17 | 0.000322911 |
|  |  |  | 18 | regulation of metabolism and protein function        | 15 | 0.000687948 |
|  |  |  | 10 | cell cycle and dna processing                        | 67 | 0.003103874 |
|  |  |  | 42 | biogenesis of cellular components                    | 56 | 0.006589054 |
|  |  |  | 43 | cell type differentiation                            | 27 | 0.013984022 |
|  |  |  | 30 | cellular communication/signal transduction mechanism | 29 | 0.029583682 |

Table S2B. Sequences used in Figure 4.

| No. | Name                                      | GeneBank Accessions |
|-----|-------------------------------------------|---------------------|
| 1   | <i>Aspergillus clavatus fphA</i>          | XP_001274979        |
| 2   | <i>Aspergillus flavus fphA</i>            | XP_002380144        |
| 3   | <i>Aspergillus fumigatus fphA</i>         | XP_746476           |
| 4   | <i>Aspergillus fumigatus fphA?</i>        | XP_750813           |
| 5   | <i>Aspergillus nidulans fphA</i>          | XP_682277           |
| 6   | <i>Aspergillus niger fphA</i>             | CAK46534            |
| 7   | <i>Aspergillus oryzae fphA</i>            | XP_001818729        |
| 8   | <i>Aspergillus terreus fphA</i>           | XP_001216524        |
| 9   | <i>Botrytis cinerea phy-1</i>             | AAR30111            |
| 10  | <i>Botrytis cinerea phy-2</i>             | AAR30112            |
| 11  | <i>Cochliobolus heterostrophus phy-1</i>  | AAR29900            |
| 12  | <i>Cryptococcus neoformans</i>            | XP_567913           |
| 13  | <i>Cyanothece sp.</i>                     | YP_003137260        |
| 14  | <i>Gibberella moniliformis phy-1</i>      | AAR30124            |
| 15  | <i>Magnaporthe grisea phy-1</i>           | XP_001412165        |
| 16  | <i>Nectria haematococca phy-1</i>         | XP_003052512        |
| 17  | <i>Neosartorya fischeri fphA</i>          | XP_001262526        |
| 18  | <i>Neosartorya fischeri fphA?</i>         | XP_001258043        |
| 19  | <i>Neurospora crassa Phy1</i>             | XP_960393           |
| 20  | <i>Neurospora crassa Phy2</i>             | AAZ57421            |
| 21  | <i>Nostoc azollae</i>                     | YP_003723286        |
| 22  | <i>Penicillium chrysogenum fphA</i>       | XP_002556620        |
| 23  | <i>Penicillium marneffeii fphA</i>        | XP_002144720        |
| 24  | <i>Phaeosphaeria nodorum phy-1</i>        | XP_001802722        |
| 25  | <i>Podospora anserine phy-1</i>           | XP_001905870        |
| 26  | <i>Podospora anserine phy-2</i>           | XP_001903686        |
| 27  | <i>Pseudomonas putida</i>                 | YP_001748669        |
| 28  | <i>Pyrenophora tritici-repentis phy-1</i> | XP_001936957        |
| 29  | <i>Sclerotinia sclerotiorum phy-1</i>     | XP_001585628        |
| 30  | <i>Sclerotinia sclerotiorum phy-2</i>     | XP_001596430        |
| 31  | <i>Sordaria macrospora phy-1</i>          | XP_003353153        |
| 32  | <i>Talaromyces stipitatus fphA</i>        | XP_002340762        |
| 33  | <i>Ustilago maydis</i>                    | XP_761879           |
| 34  | <i>Verticillium albo-atrum phy-1</i>      | XP_003000814        |

Supplemental Table S2C. Phytochromes and phytochrome-like proteins identified from published ascomyceteous genomes at the JGI fungal genome database.

| Taxonomy                                      | Sequences                                               | Genomes                                                             |                                           |
|-----------------------------------------------|---------------------------------------------------------|---------------------------------------------------------------------|-------------------------------------------|
| Dothideomycetes                               | Altbr1 5093 AB05093.1                                   | <i>Alternaria brassicicola</i> <sup>1</sup>                         |                                           |
|                                               | Aurpu var mel1 16610 gw1.15.168.1                       | <i>Aureobasidium pullulans</i> var. <i>melanogenum</i> <sup>2</sup> |                                           |
|                                               | Aurpu var nam1 44080 e gw1.6.315.1                      | <i>Aureobasidium pullulans</i> var. <i>namibiae</i> <sup>2</sup>    |                                           |
|                                               | Aurpu var pull 268792 e gw1.4.150.1                     | <i>Aureobasidium pullulans</i> var. <i>pullulans</i> <sup>2</sup>   |                                           |
|                                               | Aurpu var subl 285445 CE171331 21132                    | <i>Aureobasidium pullulans</i> var. <i>subglaciale</i> <sup>2</sup> |                                           |
|                                               | Bauco1 60611 gw1.2.1892.1                               | <i>Baudoinia compniacensis</i> <sup>1</sup>                         |                                           |
|                                               | Clafu1 186523 scf7180000128495 G13856                   | <i>Cladosporium fulvum</i> <sup>3</sup>                             |                                           |
|                                               | Coccal 4297 gm1.4297 g                                  | <i>Cochliobolus carbonum</i> <sup>4</sup>                           |                                           |
|                                               | CocheC4 1 50370 estExt Genemark1.C 110317               | <i>Cochliobolus heterostrophus</i> <sup>1</sup>                     |                                           |
|                                               | CocheC5 3 105834 CocheC5 1.estExt Genewise1Plus.C 90602 | <i>Cochliobolus heterostrophus</i> <sup>1</sup>                     |                                           |
|                                               | Cocmil 6573 gm1.6573 g                                  | <i>Cochliobolus miyabeanus</i> <sup>4</sup>                         |                                           |
|                                               | Cocsal 325851 CE121292 3167                             | <i>Cochliobolus sativus</i> <sup>1</sup>                            |                                           |
|                                               | Cocvil 27376 gm1.5980 g                                 | <i>Cochliobolus victoria</i> <sup>4</sup>                           |                                           |
|                                               | Dotse1 121759 e gw1.1.2683.1                            | <i>Dothistroma septosporum</i> <sup>3</sup>                         |                                           |
|                                               | Hyspu1 1 113029 NODE 352 length 279204 cov 25.g4723.t1  | <i>Hysterium pulicare</i> <sup>1</sup>                              |                                           |
|                                               | Lepmu1 5196 Lema T112210.1                              | <i>Leptosphaeria maculans</i> <sup>5</sup>                          |                                           |
|                                               | Macph1 11133 MPH 11376m.01                              | <i>Macrophomina phaseolina</i> <sup>6</sup>                         |                                           |
|                                               | Mycgr3 41717 e gw1.5.15.1                               | <i>Mycosphaerella graminicola</i> <sup>7</sup>                      |                                           |
|                                               | Pyrtr1 152306 PRTT 06624                                | <i>Pyrenophora teres</i> <sup>8</sup>                               |                                           |
|                                               | Pyrtr1 10762 PTTG 19668.1                               | <i>Pyrenophora tritici-repentis</i> <sup>9</sup>                    |                                           |
|                                               | Rhyru1 1 110678 NODE 2590 length 41030 cov 38.g8259.t1  | <i>Rhynchostroma rufulum</i> <sup>1</sup>                           |                                           |
|                                               | Sepmu1 145583 estExt fgenesh1 kg.C 1 t10067             | <i>Septoria musiva</i> <sup>1</sup>                                 |                                           |
|                                               | Seppo1 16291 gm1.1898 g                                 | <i>Septoria populicola</i> <sup>1</sup>                             |                                           |
|                                               | Settu1 149644 estExt Genewise1Plus.C 16 t10294          | <i>Setosphaeria turcica</i> <sup>1</sup>                            |                                           |
|                                               | Settu1 512716 CE512715 20088                            | <i>Setosphaeria turcica</i> <sup>1</sup>                            |                                           |
|                                               | Stano2 5862 SNOG 12501.3                                | <i>Stagonospora nodorum</i> <sup>10</sup>                           |                                           |
|                                               | Venpi1 211056 VP.s180.g11759.t1                         | <i>Venturia pirina</i> <sup>11</sup>                                |                                           |
|                                               | Zymar1 774380 Za111 scaffold 730 0005                   | <i>Zymoseptoria ardabiliae</i> <sup>12</sup>                        |                                           |
| Zymps1 801330 Zp221 scaffold 379 00001        | <i>Zymoseptoria pseudotritici</i> <sup>12</sup>         |                                                                     |                                           |
| Eurotiomycetes                                | Aspbr1 24753 fgenesh1 pg.1 # 285                        | <i>Arthroderma benhamiae</i> <sup>13</sup>                          |                                           |
|                                               | Aspcl1 2057 7000001156840358                            | <i>Aspergillus clavatus</i> <sup>14</sup>                           |                                           |
|                                               | Aspfl1 25661 7000001155852047                           | <i>Aspergillus flavus</i> <sup>14</sup>                             |                                           |
|                                               | Aspfo1 34706 fgenesh1 pg.9 # 267                        | <i>Aspergillus fumigatus</i> <sup>15</sup>                          |                                           |
|                                               | Aspfu A1163 1 108889 CADAFUBT00009918m.01               | <i>Aspergillus fumigatus</i> <sup>15</sup>                          |                                           |
|                                               | Aspful 4844 Afu4g02900 mRNA                             | <i>Aspergillus fumigatus</i> <sup>15</sup>                          |                                           |
|                                               | Aspka1 1 16595 AKAW 05123m.01                           | <i>Aspergillus kawachii</i> <sup>16</sup>                           |                                           |
|                                               | Aspni bvT 1 320165 estExt fgenesh1 pm.C 10211           | <i>Aspergillus niger</i> <sup>17</sup>                              |                                           |
|                                               | Aspni DSM 1 166081 An14g02970m.01                       | <i>Aspergillus niger</i> <sup>17</sup>                              |                                           |
|                                               | Aspni NRRL3 1 845 NRRL3 00845                           | <i>Aspergillus niger</i> <sup>17</sup>                              |                                           |
|                                               | Aspni7 1080634 e gw1.102.829.1                          | <i>Aspergillus niger</i> <sup>18</sup>                              |                                           |
|                                               | Aspnid1 6870 AN9008                                     | <i>Aspergillus nidulans</i> <sup>14</sup>                           |                                           |
|                                               | Aspor1 2197 AO090001000178 mRNA                         | <i>Aspergillus oryzae</i> <sup>14</sup>                             |                                           |
|                                               | Aspte1 2041 ATET 07903                                  | <i>Aspergillus terreus</i> <sup>14</sup>                            |                                           |
|                                               | Eurhel 461233 e gw1.24.337.1                            | <i>Eurotium rubrum</i> <sup>19</sup>                                |                                           |
|                                               | Neofi1 5305 7000001156986890                            | <i>Neosartorya fishcheri</i> <sup>14</sup>                          |                                           |
|                                               | Penac1 381296 estExt Genewise1.C 1 t60270               | <i>Paracoccidioides brasiliensis</i> <sup>20</sup>                  |                                           |
|                                               | Pench1 80760 e gw1.4.2264.1                             | <i>Penicillium chrysogenum</i> <sup>21</sup>                        |                                           |
|                                               | PenchWiscl 1 136770 PCH Pc06g00040                      | <i>Penicillium chrysogenum</i> <sup>21</sup>                        |                                           |
|                                               | Pendi1 4281 PDIG 49920m.01                              | <i>Penicillium digitatum</i> <sup>22</sup>                          |                                           |
|                                               | Penox1 1288 EPS26357                                    | <i>Penicillium oxalicum</i> <sup>23</sup>                           |                                           |
|                                               | Leotiomyces                                             | Ascsa1 2610 2610 t                                                  | <i>Ascocoryne sarcoides</i> <sup>24</sup> |
|                                               |                                                         | Blugr1 20670 BGHDH14 bgh02766                                       | <i>Blumeria graminis</i> <sup>25</sup>    |
| Blugr1 21444 BGHDH14 bgh01671                 |                                                         | <i>Blumeria graminis</i> <sup>25</sup>                              |                                           |
| Botci1 10642 BC1T 08283                       |                                                         | <i>Botrytis cinerea</i> <sup>26</sup>                               |                                           |
| Botci1 8154 BC1T 01106                        |                                                         | <i>Botrytis cinerea</i> <sup>26</sup>                               |                                           |
| Glalo1 10114 GLAREA 02630m.01                 |                                                         | <i>Glarea lozoyensis</i> <sup>27</sup>                              |                                           |
| Glalo1 2390 GLAREA 10892m.01                  |                                                         | <i>Glarea lozoyensis</i> <sup>27</sup>                              |                                           |
| Marbr1 2324 MBM 05870                         |                                                         | <i>Marssonina brunnea</i> <sup>28</sup>                             |                                           |
| Marbr1 2839 MBM 06385                         |                                                         | <i>Marssonina brunnea</i> <sup>28</sup>                             |                                           |
| Oidma1 163689 estExt Genewise1Plus.C 7 t30127 |                                                         | <i>Oidiodendron maius</i> <sup>29</sup>                             |                                           |
| Scslc1 7405 SS1G 12828T0                      |                                                         | <i>Sclerotinia sclerotiorum</i> <sup>30</sup>                       |                                           |
| Scslc1 8089 SS1G 13512T0                      |                                                         | <i>Sclerotinia sclerotiorum</i> <sup>30</sup>                       |                                           |

|                 |                                                     |                                                                   |
|-----------------|-----------------------------------------------------|-------------------------------------------------------------------|
|                 | Sclsc1 9235 SS1G_02650T0                            | <i>Sclerotinia sclerotiorum</i> <sup>30</sup>                     |
| Orbiliomycetes  | Artol1 10601 AOL_s00215g48m.01                      | <i>Arthrobotrys oligospora</i> <sup>31</sup>                      |
|                 | Monha1 4440 H072_4535m.01                           | <i>Monacrosporium haptotylum</i> <sup>32,33</sup>                 |
| Pezizomycetes   | Pyrco1 5746 PCON_06747m.01                          | <i>Pyronema confluens</i> <sup>34</sup>                           |
|                 | Tubme1 4182 GSTUMT00007042001                       | <i>Tuber melanosporum</i> <sup>35</sup>                           |
| Sordariomycetes | Beaba1 2816 BBA_02816m.01                           | <i>Beauveria bassiana</i> <sup>36</sup>                           |
|                 | Colgr1 10012 GLRG_10611T0                           | <i>Colletotrichum graminicola</i> <sup>37</sup>                   |
|                 | Colhi1 8988 CH063_11183T0                           | <i>Colletotrichum higginsianum</i> <sup>37</sup>                  |
|                 | Cormil 4450 CCM_04461m.01                           | <i>Cordyceps militaris</i> <sup>38</sup>                          |
|                 | Eutla1 4740 UCREL1_9450m.01                         | <i>Eutypa lata</i> <sup>39</sup>                                  |
|                 | Fusfu1 8568 FFUJ_05887m.01                          | <i>Fusarium fujikuroi</i> <sup>40</sup>                           |
|                 | Fusgr1 9632 FGSG_08608T0                            | <i>Fusarium graminearum</i> <sup>41</sup>                         |
|                 | Fusox1 11092 FOXG_03424                             | <i>Fusarium oxysporum</i> f. sp. <i>Lycopersici</i> <sup>42</sup> |
|                 | Fusox2 17584 FOXG_03424T0                           | <i>Fusarium oxysporum</i> <sup>42</sup>                           |
|                 | Fusox2 17585 FOXG_03424T1                           | <i>Fusarium oxysporum</i> <sup>42</sup>                           |
|                 | Fusve1 7054 FVEG_02296T0                            | <i>Fusarium verticillioides</i> <sup>42</sup>                     |
|                 | Fusve2 10239 FVEG_02296T0                           | <i>Fusarium verticillioides</i> <sup>42</sup>                     |
|                 | Fusve2 10240 FVEG_02296T1                           | <i>Fusarium verticillioides</i> <sup>42</sup>                     |
|                 | Maggr1 120527 MGG_12377T0                           | <i>Magnaporthe grisea</i> <sup>43</sup>                           |
|                 | Metac1 4734 MAC_04734m.01                           | <i>Metarhizium acridum</i> <sup>44</sup>                          |
|                 | Metan1 2298 MAA_02298m.01                           | <i>Metarhizium robertsii</i> <sup>44</sup>                        |
|                 | Necha2 91733 fgenesh1_pm.sca_2_chr3_3_0000133       | <i>Nectria haematococca</i> <sup>45</sup>                         |
|                 | Neucr_trp3_1 10659 Neucr2.NCU05790T0                | <i>Neurospora crassa</i> <sup>46</sup>                            |
|                 | Neucr_trp3_1 1269615 fgenesh1_pg.7_#_80             | <i>Neurospora crassa</i> <sup>47</sup>                            |
|                 | Neucr2 10659 NCU05790T0                             | <i>Neurospora crassa</i> <sup>47</sup>                            |
|                 | Neucr2 8817 NCU04834T0                              | <i>Neurospora crassa</i> <sup>47</sup>                            |
|                 | Neute_mat_a1 131250 fgenesh2_pm.6_#_120             | <i>Neurospora tetrasperma</i> <sup>48</sup>                       |
|                 | Neute_mat_a1 96894 estExt_Genewise1.C_72170         | <i>Neurospora tetrasperma</i> <sup>48</sup>                       |
|                 | Neute_matA2 46279 e_gw1.5.55.1                      | <i>Neurospora tetrasperma</i> <sup>48</sup>                       |
|                 | Neute_matA2 87274 estExt_Genewise1Plus.C_60544      | <i>Neurospora tetrasperma</i> <sup>48</sup>                       |
|                 | Phaal1 1267 UCRPA7_2680m.01                         | <i>Phaeoacremonium aleophilum</i> <sup>49</sup>                   |
|                 | Podan2 5532 Pa_4_890                                | <i>Podospora anserine</i> <sup>50</sup>                           |
|                 | Podan2 5984 Pa_4_9540                               | <i>Podospora anserina</i> <sup>50</sup>                           |
|                 | Thiar1 702547 e_gw1.3.1052.1                        | <i>Thielavia terrestris</i> <sup>51</sup>                         |
|                 | Triat2 319399 estExt_Genemark.C_contig_250425       | <i>Trichoderma atroviride</i> <sup>52</sup>                       |
|                 | Trire2 77764 estExt_GeneWisePlus.C_80856            | <i>Trichoderma reesei</i> <sup>53</sup>                           |
|                 | TrireRUTC30_1 98151 estExt_Genewise1Plus.C_7_t10008 | <i>Trichoderma reesei</i> <sup>53</sup>                           |
|                 | TriviGv29_8_2 190601 fgenesh1_pm.5_#_361            | <i>Trichoderma virens</i> <sup>52</sup>                           |
|                 | Veral1 3365 VDBG_09309T0                            | <i>Verticillium alfalfa</i> <sup>54</sup>                         |
|                 | Verdal1 2980 VDAG_07462T0                           | <i>Verticillium dahlia</i> <sup>54</sup>                          |
|                 | Taphrinomycetes                                     | Tapde1_1 1672 TAPDE_002075g.01                                    |

## Reference:

- 1 Ohm, R. A. *et al.* Diverse lifestyles and strategies of plant pathogenesis encoded in the genomes of eighteen Dothideomycetes fungi. *PLoS pathogens* **8**, e1003037, doi:10.1371/journal.ppat.1003037 (2012).
- 2 Gostincar, C. *et al.* Genome sequencing of four *Aureobasidium pullulans* varieties: biotechnological potential, stress tolerance, and description of new species. *BMC Genomics* **15**, 549, doi:10.1186/1471-2164-15-549 (2014).
- 3 de Wit, P. J. G. M. *et al.* The Genomes of the Fungal Plant Pathogens *Cladosporium fulvum* and *Dothistroma septosporum* Reveal Adaptation to Different Hosts and Lifestyles But Also Signatures of Common Ancestry. *Plos Genetics* **8**, doi:ARTN e1003088; 10.1371/journal.pgen.1003088 (2012).
- 4 Condon, B. J. *et al.* Comparative Genome Structure, Secondary Metabolite, and Effector Coding Capacity across *Cochliobolus* Pathogens. *Plos Genetics* **9**, doi:ARTN e1003233; 10.1371/journal.pgen.1003233 (2013).



- 5 Rouxel, T. *et al.* Effector diversification within compartments of the  
Leptosphaeria maculans genome affected by Repeat-Induced Point  
mutations. *Nat Commun* **2**, doi:10.1038/ncomms1189 (2011).
- 6 Islam, M. S. *et al.* Tools to kill: Genome of one of the most destructive plant  
pathogenic fungi Macrophomina phaseolina. *BMC Genomics* **13**, doi:Artn 493;  
10.1186/1471-2164-13-493 (2012).
- 7 Goodwin, S. B. *et al.* Finished Genome of the Fungal Wheat Pathogen  
Mycosphaerella graminicola Reveals Dispensome Structure, Chromosome  
Plasticity, and Stealth Pathogenesis. *Plos Genetics* **7**, doi:ARTN e1002070;  
10.1371/journal.pgen.1002070 (2011).
- 8 Ellwood, S. R. *et al.* A first genome assembly of the barley fungal pathogen  
Pyrenophora teres f. teres. *Genome Biology* **11**, doi:Artn R109; 10.1186/Gb-  
2010-11-11-R109 (2010).
- 9 Manning, V. A. *et al.* Comparative Genomics of a Plant-Pathogenic Fungus,  
Pyrenophora tritici-repentis, Reveals Transduplication and the Impact of  
Repeat Elements on Pathogenicity and Population Divergence. *G3-Genes  
Genom Genet* **3**, 41-63, doi:10.1534/g3.112.004044 (2013).
- 10 Hane, J. K. *et al.* Dothideomycete-plant interactions illuminated by genome  
sequencing and EST analysis of the wheat pathogen Stagonospora nodorum.  
*Plant Cell* **19**, 3347-3368, doi:10.1105/tpc.107.052829 (2007).
- 11 Cooke, I. R. *et al.* Proteogenomic Analysis of the Venturia pirina (Pear Scab  
Fungus) Secretome Reveals Potential Effectors. *J Proteome Res* **13**, 3635-  
3644, doi:10.1021/pr500176c (2014).
- 12 Stukenbrock, E. H., Christiansen, F. B., Hansen, T. T., Dutheil, J. Y. & Schierup,  
M. H. Fusion of two divergent fungal individuals led to the recent emergence  
of a unique widespread pathogen species. *Proceedings of the National  
Academy of Sciences of the United States of America* **109**, 10954-10959,  
doi:10.1073/pnas.1201403109 (2012).
- 13 Burmester, A. *et al.* Comparative and functional genomics provide insights  
into the pathogenicity of dermatophytic fungi. *Genome Biology* **12**, doi:Artn  
R7; 10.1186/Gb-2011-12-1-R7 (2011).
- 14 Arnaud, M. B. *et al.* The Aspergillus Genome Database (AspGD): recent  
developments in comprehensive multispecies curation, comparative  
genomics and community resources. *Nucleic Acids Research* **40**, D653-D659,  
doi:10.1093/nar/gkr875 (2012).
- 15 Fedorova, N. D. *et al.* Genomic islands in the pathogenic filamentous fungus  
Aspergillus fumigatus. *Plos Genetics* **4**, doi:ARTN e1000046;  
10.1371/journal.pgen.1000046 (2008).
- 16 Futagami, T. *et al.* Genome Sequence of the White Koji Mold Aspergillus  
kawachii IFO 4308, Used for Brewing the Japanese Distilled Spirit Shochu.  
*Eukaryotic Cell* **10**, 1586-1587, doi:10.1128/EC.05224-11 (2011).
- 17 Andersen, M. R. *et al.* Comparative genomics of citric-acid-producing  
Aspergillus niger ATCC 1015 versus enzyme-producing CBS 513.88. *Genome  
Research* **21**, 885-897, doi:10.1101/gr.112169.110 (2011).

- 18 Pel, H. J. *et al.* Genome sequencing and analysis of the versatile cell factory *Aspergillus niger* CBS 513.88. *Nat Biotechnol* **25**, 221-231, doi:10.1038/nbt1282 (2007).
- 19 Kis-Papo, T. *et al.* Genomic adaptations of the halophilic Dead Sea filamentous fungus *Eurotium rubrum*. *Nat Commun* **5**, doi:Artn 3745; 10.1038/Ncomms4745 (2014).
- 20 Desjardins, C. A. *et al.* Comparative Genomic Analysis of Human Fungal Pathogens Causing Paracoccidioidomycosis. *Plos Genetics* **7**, doi:ARTN e1002345; 10.1371/journal.pgen.1002345 (2011).
- 21 van den Berg, M. A. *et al.* Genome sequencing and analysis of the filamentous fungus *Penicillium chrysogenum*. *Nat Biotechnol* **26**, 1161-1168, doi:10.1038/nbt.1498 (2008).
- 22 Marcet-Houben, M. *et al.* Genome sequence of the necrotrophic fungus *Penicillium digitatum*, the main postharvest pathogen of citrus. *BMC Genomics* **13**, doi:Artn 646; 10.1186/1471-2164-13-646 (2012).
- 23 Liu, G. D. *et al.* Genomic and Secretomic Analyses Reveal Unique Features of the Lignocellulolytic Enzyme System of *Penicillium decumbens*. *Plos One* **8**, doi:ARTN e55185; 10.1371/journal.pone.0055185 (2013).
- 24 Gianoulis, T. A. *et al.* Genomic Analysis of the Hydrocarbon-Producing, Cellulolytic, Endophytic Fungus *Ascocoryne sarcoides*. *Plos Genetics* **8**, doi:ARTN e1002558; 10.1371/journal.pgen.1002558 (2012).
- 25 Spanu, P. D. *et al.* Genome expansion and gene loss in powdery mildew fungi reveal tradeoffs in extreme parasitism. *Science* **330**, 1543-1546, doi:10.1126/science.1194573 (2010).
- 26 Staats, M. & van Kan, J. A. L. Genome Update of *Botrytis cinerea* Strains B05.10 and T4. *Eukaryotic Cell* **11**, 1413-1414, doi:10.1128/EC.00164-12 (2012).
- 27 Chen, L. *et al.* Genomics-driven discovery of the pneumocandin biosynthetic gene cluster in the fungus *Glarea lozoyensis*. *BMC Genomics* **14**, doi:Artn 339; 10.1186/1471-2164-14-339 (2013).
- 28 Zhu, S. *et al.* Sequencing the genome of *Marssonina brunnea* reveals fungus-poplar co-evolution. *BMC Genomics* **13**, doi:Artn 382; 10.1186/1471-2164-13-382 (2012).
- 29 Kohler, A. *et al.* Convergent losses of decay mechanisms and rapid turnover of symbiosis genes in mycorrhizal mutualists (vol 47, pg 410, 2015). *Nat Genet* **47** (2015).
- 30 Amselem, J. *et al.* Genomic Analysis of the Necrotrophic Fungal Pathogens *Sclerotinia sclerotiorum* and *Botrytis cinerea*. *Plos Genetics* **7**, doi:ARTN e1002230; 10.1371/journal.pgen.1002230 (2011).
- 31 Yang, J. K. *et al.* Genomic and Proteomic Analyses of the Fungus *Arthrobotrys oligospora* Provide Insights into Nematode-Trap Formation. *PLoS pathogens* **7**, doi:ARTN e1002179; 10.1371/journal.ppat.1002179 (2011).
- 32 Andersson, K. M. *et al.* Proteome of the Nematode-Trapping Cells of the Fungus *Monacrosporium haptotylum*. *Appl Environ Microb* **79**, 4993-5004, doi:10.1128/AEM.01390-13 (2013).

- 33 Meerupati, T. *et al.* Genomic Mechanisms Accounting for the Adaptation to Parasitism in Nematode-Trapping Fungi. *Plos Genetics* **9**, doi:ARTN e1003909; 10.1371/journal.pgen.1003909 (2013).
- 34 Traeger, S. *et al.* The Genome and Development-Dependent Transcriptomes of *Pyronema confluens*: A Window into Fungal Evolution. *PLoS genetics* **9**, doi:ARTN e1003820; 10.1371/journal.pgen.1003820 (2013).
- 35 Martin, F. *et al.* Perigord black truffle genome uncovers evolutionary origins and mechanisms of symbiosis. *Nature* **464**, 1033-1038, doi:10.1038/nature08867 (2010).
- 36 Xiao, G. H. *et al.* Genomic perspectives on the evolution of fungal entomopathogenicity in *Beauveria bassiana*. *Sci Rep-Uk* **2**, doi:Artn 483; 10.1038/Srep00483 (2012).
- 37 O'connell, R. J. *et al.* Lifestyle transitions in plant pathogenic *Colletotrichum* fungi deciphered by genome and transcriptome analyses. *Nature genetics* **44**, 1060-1063, doi:10.1038/ng.2372 (2012).
- 38 Zheng, P. *et al.* Genome sequence of the insect pathogenic fungus *Cordyceps militaris*, a valued traditional chinese medicine. *Genome Biol* **12**, doi:Artn R116; 10.1186/Gb-2011-12-11-R116 (2011).
- 39 Blanco-Ulate, B., Rolshausen, P. E. & Cantu, D. Draft Genome Sequence of the Grapevine Dieback Fungus *Eutypa lata* UCR-EL1. *Genome announcements* **1**, doi:10.1128/genomeA.00228-13 (2013).
- 40 Wiemann, P. *et al.* Deciphering the cryptic genome: genome-wide analyses of the rice pathogen *Fusarium fujikuroi* reveal complex regulation of secondary metabolism and novel metabolites. *PLoS pathogens* **9**, e1003475, doi:10.1371/journal.ppat.1003475 (2013).
- 41 Cuomo, C. A. *et al.* The *Fusarium graminearum* genome reveals a link between localized polymorphism and pathogen specialization. *Science* **317**, 1400-1402, doi:10.1126/science.1143708 (2007).
- 42 Ma, L. J. *et al.* Comparative genomics reveals mobile pathogenicity chromosomes in *Fusarium*. *Nature* **464**, 367-373, doi:10.1038/nature08850 (2010).
- 43 Dean, R. A. *et al.* The genome sequence of the rice blast fungus *Magnaporthe grisea*. *Nature* **434**, 980-986, doi:10.1038/nature03449 (2005).
- 44 Gao, Q. A. *et al.* Genome Sequencing and Comparative Transcriptomics of the Model Entomopathogenic Fungi *Metarhizium anisopliae* and *M. acridum*. *PLoS genetics* **7**, doi:ARTN e1001264; 10.1371/journal.pgen.1001264 (2011).
- 45 Coleman, J. J. *et al.* The Genome of *Nectria haematococca*: Contribution of Supernumerary Chromosomes to Gene Expansion. *PLoS genetics* **5**, doi:ARTN e1000618; 10.1371/journal.pgen.1000618 (2009).
- 46 Baker, S. E. *et al.* Draft Genome Sequence of *Neurospora crassa* Strain FGSC 73. *Genome announcements* **3**, doi:10.1128/genomeA.00074-15 (2015).
- 47 Galagan, J. E. *et al.* The genome sequence of the filamentous fungus *Neurospora crassa*. *Nature* **422**, 859-868, doi:10.1038/nature01554 (2003).

- 48 Ellison, C. E. *et al.* Massive changes in genome architecture accompany the transition to self-fertility in the filamentous fungus *Neurospora tetrasperma*. *Genetics* **189**, 55-69, doi:10.1534/genetics.111.130690 (2011).
- 49 Blanco-Ulate, B., Rolshausen, P. & Cantu, D. Draft Genome Sequence of the Ascomycete *Phaeoacremonium aleophilum* Strain UCR-PA7, a Causal Agent of the Esca Disease Complex in Grapevines. *Genome announcements* **1**, doi:10.1128/genomeA.00390-13 (2013).
- 50 Espagne, E. *et al.* The genome sequence of the model ascomycete fungus *Podospora anserina*. *Genome Biol* **9**, R77, doi:10.1186/gb-2008-9-5-r77 (2008).
- 51 Berka, R. M. *et al.* Comparative genomic analysis of the thermophilic biomass-degrading fungi *Myceliophthora thermophila* and *Thielavia terrestris*. *Nature biotechnology* **29**, 922-927, doi:10.1038/nbt.1976 (2011).
- 52 Kubicek, C. P. *et al.* Comparative genome sequence analysis underscores mycoparasitism as the ancestral life style of *Trichoderma*. *Genome Biol* **12**, R40, doi:10.1186/gb-2011-12-4-r40 (2011).
- 53 Martinez, D. *et al.* Genome sequencing and analysis of the biomass-degrading fungus *Trichoderma reesei* (syn. *Hypocrea jecorina*). *Nature biotechnology* **26**, 553-560, doi:10.1038/nbt1403 (2008).
- 54 Klosterman, S. J. *et al.* Comparative genomics yields insights into niche adaptation of plant vascular wilt pathogens. *PLoS pathogens* **7**, e1002137, doi:10.1371/journal.ppat.1002137 (2011).
- 55 Cisse, O. H. *et al.* Genome Sequencing of the Plant Pathogen *Taphrina deformans*, the Causal Agent of Peach Leaf Curl. *mBio* **4**, doi:ARTN e00055-13; 10.1128/mBio.00055-13 (2013).
