# Supplementary figures and images for: The Fast-Evolving phy-2 Gene Modulates Sexual Development in Response to Light in the Model Fungus Neurospora crassa
Source: PubMed Central journal article supplement — mBio. 2016 Mar 8;7(2):e02148-15. doi: 10.1128/mBio.02148-15 (PMC4810495; doi:10.1128/mbio.02148-15), 2016-03-08

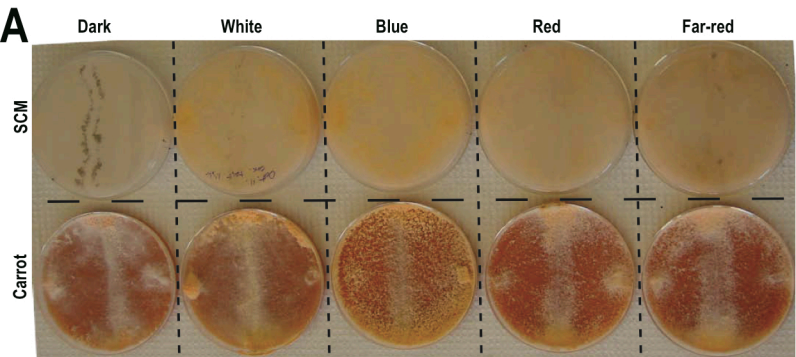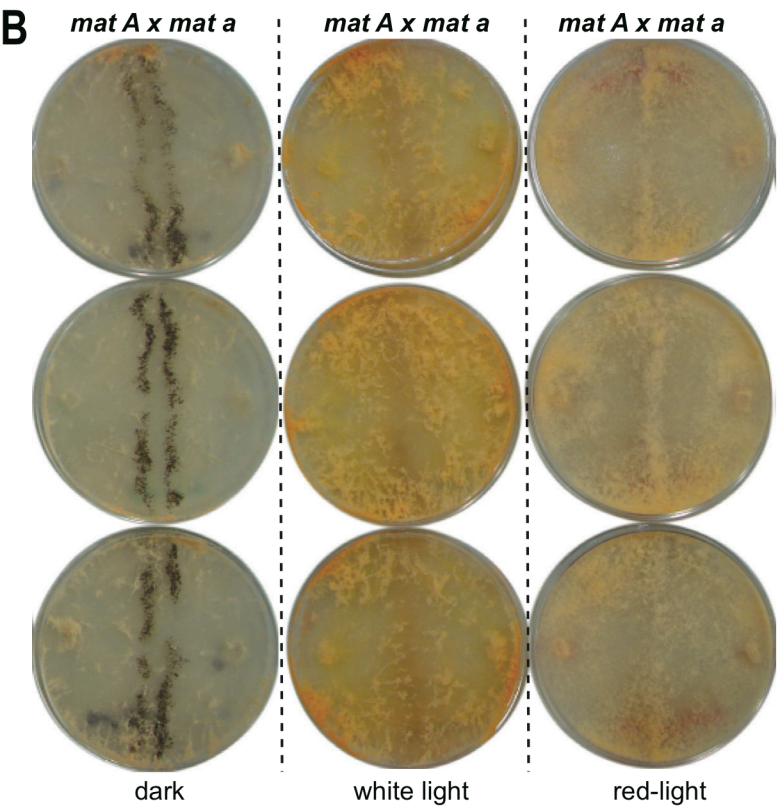

# Blue light

## C

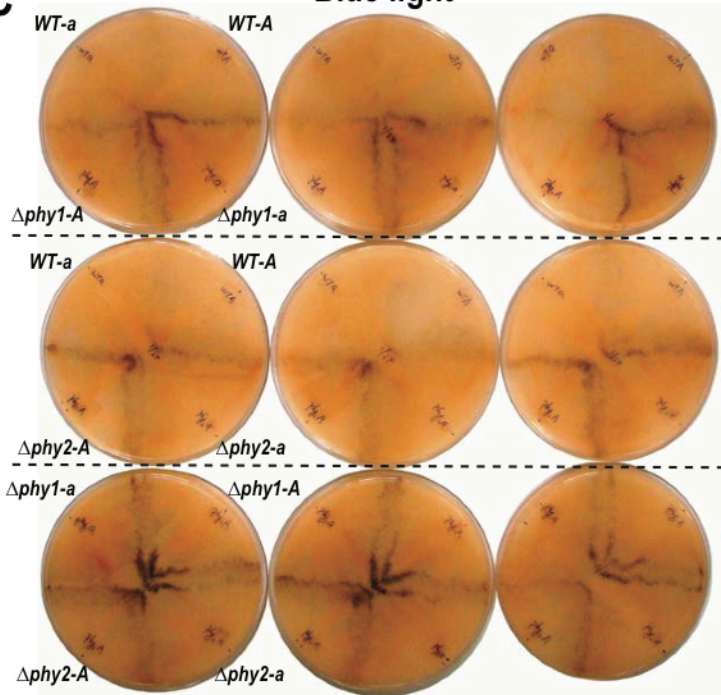

## D

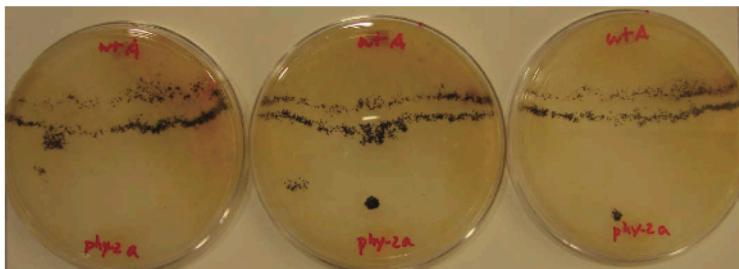

Supplement: mbo001162714sf5.pdf [file mbo001162714sf5.pdf]
